# Supplementary material for: The protein subunit of telomerase displays patterns of dynamic evolution and conservation across different metazoan taxa
Source: PubMed Central journal article supplement (PMC5405514; doi:10.1186/s12862-017-0949-4), 2017-04-26

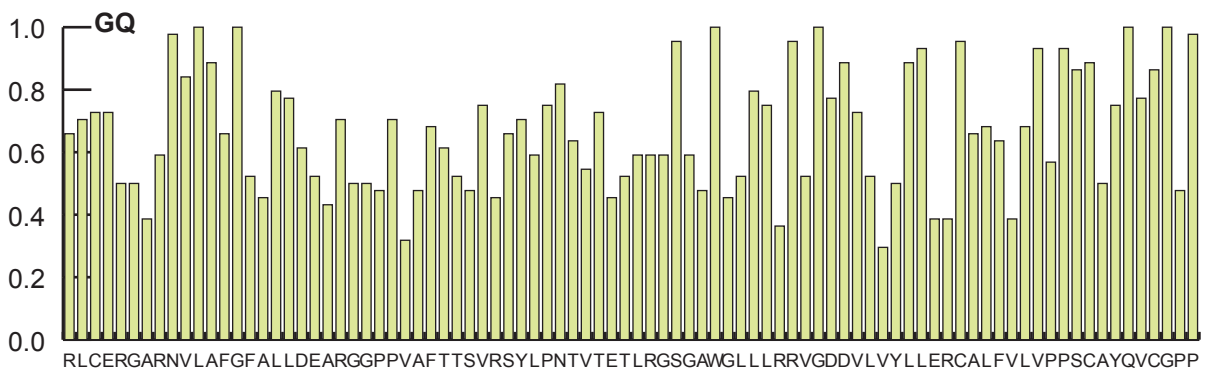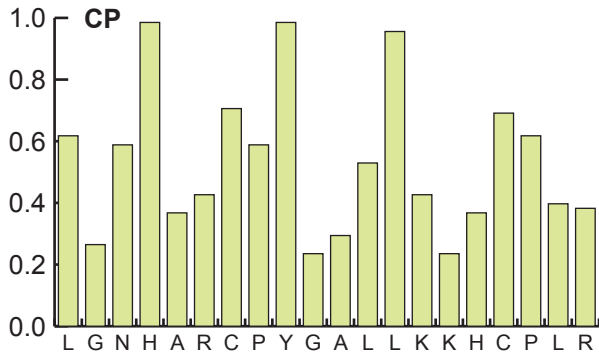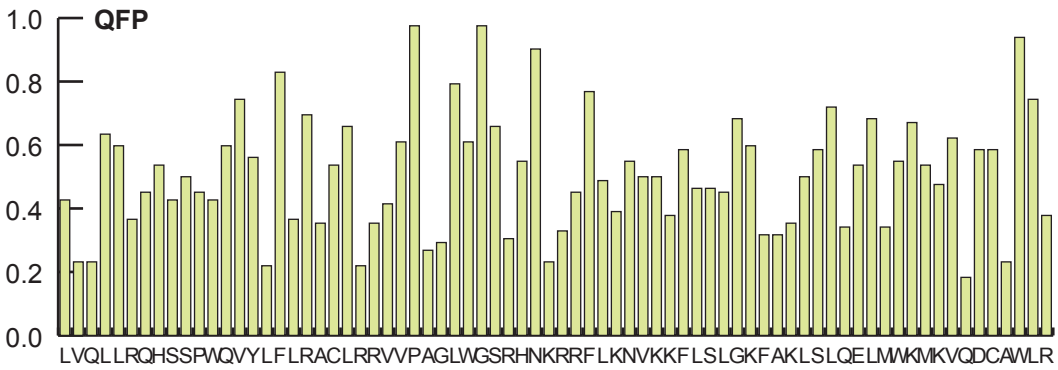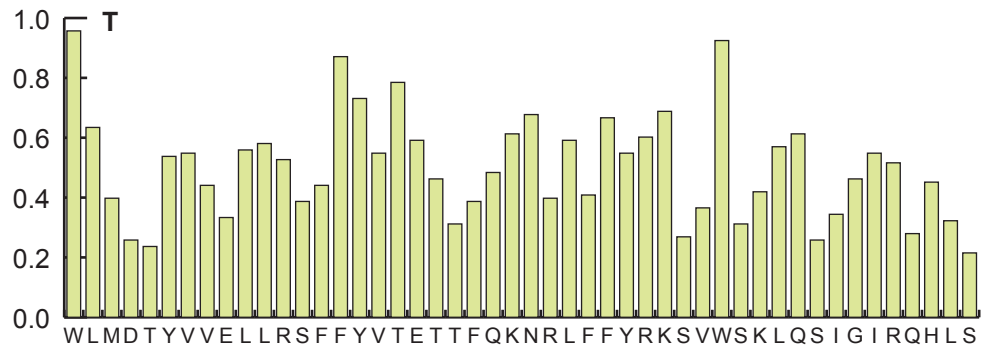

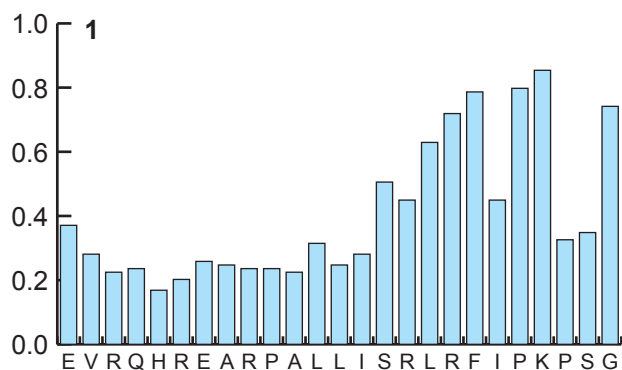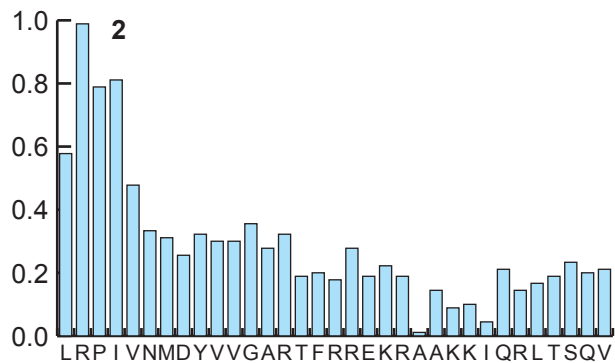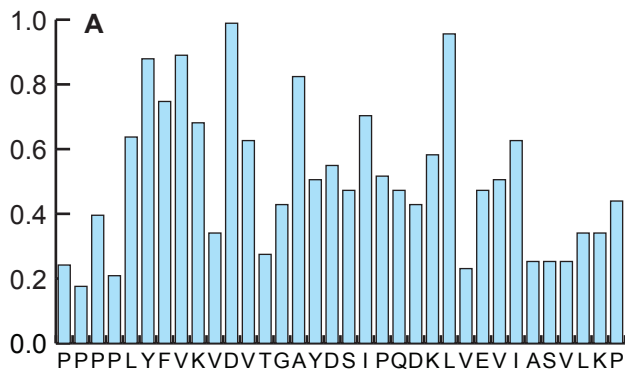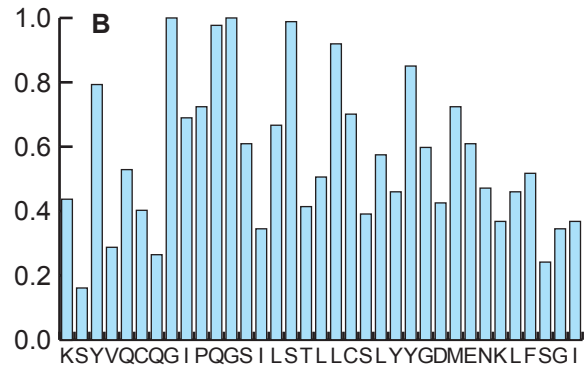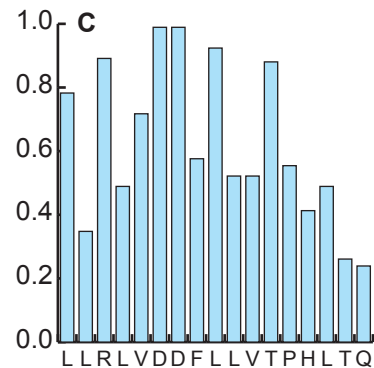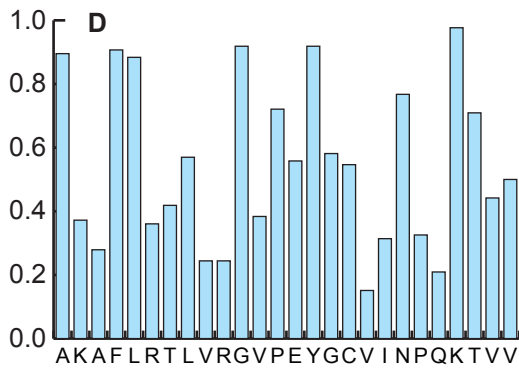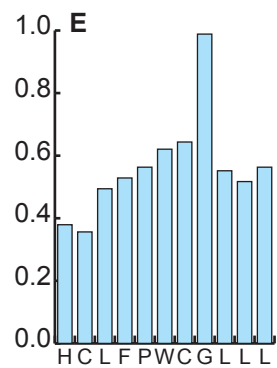

Supplement: 12862_2017_949_MOESM2_ESM.pdf [file 12862_2017_949_MOESM2_ESM.pdf]
