# Supplementary material for: The protein subunit of telomerase displays patterns of dynamic evolution and conservation across different metazoan taxa
Source: PubMed Central journal article supplement (PMC5405514; doi:10.1186/s12862-017-0949-4), 2017-04-26
Supplement: 12862_2017_949_MOESM16_ESM.pdf [file 12862_2017_949_MOESM16_ESM.pdf]

1 10 20 30 40 50 60 70 77

*Procerodes plebeja* T --- KVPBS LPHFEVVC EIKRRLTSTLNKHELLTEE -NFKLLMNFCRHHTLSMEXYGYMÖLHSDICSGMKLPT-KINNN  
*Dendrocoelum lacteum* I --- KLPGLI EHFVVSIS ELKKMKIKVSDLDKKEYFLNTG SETVLYRYCKHVFISMVYAGFIMLSDICTS MKLDA-KFEN  
*Polycelis felina* D --- KPPSHVHEHYVRL LLLKKIKKVNITQYL--PGNEAVLYRFCKYHLSMIOYAGFILLSDVCSAMKTEA-NYAK  
*Polycelis nigra* K --- KMPQSVHEHYVFNGL ELKKKIKKQTDVVQYL--PKNKGITLYRFCKYVLSMIOYAGYVILLSDICTS MKVNA-NYEL  
*Girardia tigrina* K --- IVPQST EHFVFCG EIKKKIKKINQNLDDL YLLYSCKNSILMKFCFKHLSMIDYKYYSYISLSDVCKT F KISG-NYLLK  
*Schmidtea lugubris* K --- IVPNS IDHYQVRS ELKSOQKCNLDLDFINFS NKSITFYNHCKYVLSMAYKAYLSLSDVCKSMKINS-TCNS  
*Schmidtea mediterranea* K --- IVPDS INHYQVRA ELKSOQKCNLDLDFLNSLNTSITFYSYCKYVLSMAYKAYLSLSDVCKSMKINS-KCNT  
*Dugesia benazzi* K --- HVPDS VEHYNTS ELKKOQKQNLDELDFLNNRF NKSIVLKYCKHLSMYSKYYSYISLSDICTS MKINA-KKCN  
*Dugesia japonica* Q --- RVPDS VEHYKVTET ELKKOQKQNLDELDFLNNRF NKSIVLKYCKHLSMYSKYYSYISLSDICTS MKINA-KKCN  
*Dugesia ryukyensis* Q --- KVPNS EHFYETET ELKKOQKMFNDELDFMNSFNKSITFLKFCFKHLSMYSKYYSYISLSDICTS MKINA-KKRA  
*Dugesia tahitiensis* Q --- QVPNS EHFYETET ELKKOQKMFNDELDFMNSFNKSITFLKFCFKHLSMYSKYYSYISLSDICTS MKINA-KKPA  
*Aplysia californica* KNNMLSDDFLPVQSTLEL EIRCFILKVPKSA LMGKRRNFNFTLKHVQFPLSTIQKGTMSLHYLCANIKVVKVIPMIO  
*Biomphalaria glabrata* E --- L TSDFTSANKVMLEL ERSBI L I KILVPO S MGTFRNFNFTPLSYIKDOLSMNSDHSISVQOMVQELTKTKIIMWK  
*Crassostrea gigas* V --- L LKDCWPPQKVMLEL ERLKRVFIEVVPLOIVGCLHNRNRLPKAIKILDLVYLGRYEKMCVGDLLKGEKTKTKIIPMLK  
*Homo sapiens* PRRRLVQLLRQHSPPWQVMG EVRACLRRLVPPGLWGRSHNERRFLRNTKRFISLGGKHKLSLQELTWTWKSIVRDCALRLR

QFP

1 10 20 30 40 48 1 10 20 25

*Procerodes plebeja* HIFYDELVPLKHNYYWCOASVETNSVLYESYSOWEHRFIKLVGEANET VLKSSNMHHAASIRCVLKS-SBTND  
*Dendrocoelum lacteum* HIFYNDELVPLKHNYYWCOSSPELCTVYYSYNSWHITFLRQVGRFVET EIRNNDERGVALVRCVLRNA-FSGD  
*Polycelis felina* HIFYNEVPLKHNYYWCOSSISBSDSVVYFYYSNWHITFLRQVGSQRFHR THADNPPDRGVALVRFVLRNA-NNSD  
*Polycelis nigra* RIFYNEVPLKHNYYWCOSSSLEBADTVYFYYSNWHITFLRQVGSQRFHO THANPNPICGLVRLVLRNA-ALSD  
*Girardia tigrina* LIFYDEVLVPLKHNYYWCOSSP IENSSVYFYFYAHEHFLNQAALYFVYS EMKEIKSDNENIRVFLRNS-KTRRE  
*Schmidtea lugubris* HIFYYDELVPLKHNYYWCOSSPANYSTVVYFYLSWHEFFOASASYYTN RIKELKYNWGTARCLVLRNA-ETRD  
*Schmidtea mediterranea* HIFYYDELVPLKHNYYWCOSSPANSNSVVYFYLSWHEFFOASASYYTN RIKELKYNWGTARCLVLRNA-ETRD  
*Dugesia benazzi* LIFYYDELVPLKHNYYWCOSSPMDYSTVVYFYFSWHEFFOASAAALYYTN KIKEMKDHKGTARCLVLRNA-ETRD  
*Dugesia japonica* LIFYYDELVPLKHNYYWCOSSPIDYSTVVYFYFSWHEFFOASAAALYYTN KIKELKGYKAVTRCLVLRNA-OTYD  
*Dugesia ryukyensis* LIFYYDELVPLKHNYYWCOSSPIDYSTVVYFYFSWHEFFOASAAALYYTN KIKELKGYKAVTRCLVLRNA-OTYD  
*Dugesia tahitiensis* LIFYYDELVPLKHNYYWCOSSPIDYSTVVYFYFSWHEFFOASAAALYYTN KIKELKGYKAVTRCLVLRNA-OTYD  
*Aplysia californica* FFMHKVLEFELVQSFVYVTSSTTHKKRLLFEERKKTWRLHOQSCAHEFK WVOEKRRQKGLGVCTVRFLLKKS  
*Biomphalaria glabrata* YLVVVRIVGQFVYSFVYVTSSEMYKNNRLLFEERKKTWKLIIQFATSKLKN WVAQRKISGHCLGVSOARFLLKSG  
*Crassostrea gigas* WLVNDELVPLKTVFVYVTEAATFRNQLLEERKKTWVSKLSHNSGKIDLRK AVTASLONGSCLGEASTRFLLKLS  
*Homo sapiens* WLVMSVYVPLRSLRFVYVTEATFQKNNRLLFEERKKSWSKLSQSGTGRQHFHK EVROHREARPALLSRRLRFLLKPDG

T

I

1 10 20 30 31 1 10 20 30 36

*Procerodes plebeja* YRLLANLRGDPNRP HSSVSTHALFMN---NQ CRQFYIVRADIKCCYDLSLRHDI LRCVFLNLLS--Q  
*Dendrocoelum lacteum* YRLYNSLRFPQSSTTKRISSELCSSRDPIANE HCFQFFIVRADIKCYESINHSILRHFVFLNLLSQIN  
*Polycelis felina* YRLYNSLRGFPQSVQNKGGGDI CSSHKFLENE CRQFFIVRADIKCYESIDQITLRCVFLNLLSQQO  
*Polycelis nigra* YRLYNSLRFPQSTKINKSVTEICSSNKL FENE HRQFFIVRADVNSCYESTHDSM LRCVFLNHTSQQE  
*Girardia tigrina* YRLYNSLRGVKKS DLRRLRTVQYKAVNP--KI CEFYIVRADVNRNCEYSLRHSLRVSFNSLTF--K  
*Schmidtea lugubris* YRLYNSLRPKPKSHQV KYSRKKS KIVDF--KL KNRQFYIVRADVNRNCEYSLRHODLRSEFSDLS--K  
*Schmidtea mediterranea* YRLYNSLRKTKQSHLT KYSRKKS KIVDF--KS QNRQFYIVRADVNRNCEYSLRHODLRSEFSDLS--K  
*Dugesia benazzi* YRLYNSLRKTKQSHG-RFSRKKVKIVDF--KS KNRQFYIVRADVNRNCEYSLRHODLRSEFSDLS--K  
*Dugesia japonica* YRLYNSLRKTKQSDNRPLRKKVKIVDF--KS KNRQFYIVRADVNRNCEYSLRHODLRSEFSDLS--K  
*Dugesia ryukyensis* YRLYNSLRKTKQSDNRPRPSKVKVKIVDS--KL KNRQFYIVRADVNRNCEYSLRHODLRSEFSDLS--K  
*Dugesia tahitiensis* YRLYNSLRKTKQSDNRPRPSKVKVKIVDS--KL KNRQFYIVRADVNRNCEYSLRHODLRSEFSDLS--K  
*Aplysia californica* LRPVIVNM-----SQRSKHDVSNK--HL IKQLVYVVDHTEKCFDITNPLCYSVQVQNH--S  
*Biomphalaria glabrata* LRPVIVNM-----SKAQGISNHN--HL VQRIYVYVVDHTEKCFDITNPLCYSLKNNHFL  
*Crassostrea gigas* LRPVIVNLI-----GRQPPPIAKSALPINK--QL ERNHLVYVVDHTEKCFDITNPLCYSLVQVQNH--S  
*Homo sapiens* LRPVIVNMDVYVVGARTFRREKRAERTS--RV PPELVYVYVVDHTEKCFDITNPLCYSLVQVQNH--P

2

A

1 10 20 30 36 1 10 18 1 10 20 26

*Procerodes plebeja* KHVYHLKCGVPOGCSLSQFLCNYMLLHKKKKEPFDHL LHOYVDDLLFRTCSQNK AQSFLRRLKKNVYFQYGLNINENKIIIC  
*Dendrocoelum lacteum* EYVHQCFCVPOGCSLSLPLCNYMLLHKKKKEPFDHI HFOYVDDLLFRTCSYDK ABSFLRRLKNSVYFKYGMELNENSKIIIC  
*Polycelis felina* EYVHQCFCVPOGCSLSLPLCNYMLLHKKKKEPFDHI HFOYVDDLLFRTCSYTV ABSFLRRLKNSVYFKYGMELNENSKIIIC  
*Polycelis nigra* EYVHQCFCVPOGCSLSLPLCNYMLLHKKKKEPFDHI HFOYVDDLLFRTCSQTV ABSFLRRLKNSVYFKYGMELNENSKIIIC  
*Girardia tigrina* NYVYQVICVPOGCSLSVYLCGYMLLHKKKKEPFDFA HFOYVDDLLFRTCSQKY ABSFLRRLKNSVYFKYGMELNENSKIIIC  
*Schmidtea lugubris* NYVYQVICVPOGCSLSVYLCGYMLLHKKKKEPFDHI HFOYVDDLLFRTCSQTE ABSFLRRLKNSVYFKYGMELNENSKIIIC  
*Schmidtea mediterranea* NYVYQVICVPOGCSLSVYLCGYMLLHKKKKEPFDFA HFOYVDDLLFRTCSQTE ABSFLRRLKNSVYFKYGMELNENSKIIIC  
*Dugesia benazzi* NYVYQVICVPOGCSLSVYLCGYMLLHKKKKEPFDFA HFOYVDDLLFRTCSQTE ABSFLRRLKNSVYFKYGMELNENSKIIIC  
*Dugesia japonica* NYVYQVICVPOGCSLSVYLCGYMLLHKKKKEPFDFA HFOYVDDLLFRTCSQTE ABSFLRRLKNSVYFKYGMELNENSKIIIC  
*Dugesia ryukyensis* SYVYQVICVPOGCSLSVYLCGYMLLHKKKKEPFDFA HFOYVDDLLFRTCSQTE ABSFLRRLKNSVYFKYGMELNENSKIIIC  
*Dugesia tahitiensis* NYVYQVICVPOGCSLSVYLCGYMLLHKKKKEPFDFT HFOYVDDLLFRTCSQTE ABSFLRRLKNSVYFKYGMELNENSKIIIC  
*Aplysia californica* QHVYQVSMGCEPOGCSLSVYLCGYMLLHKKKKEPFDFA HFOYVDDLLFRTCSQTE ABSFLRRLKNSVYFKYGMELNENSKIIIC  
*Biomphalaria glabrata* QHVYQVTLGTAQSGSLSVYLCGAYGYMLLHKKKKEPFDFA HFOYVDDLLFRTCSQTE ABSFLRRLKNSVYFKYGMELNENSKIIIC  
*Crassostrea gigas* QVYKQVCGIISOGSFLSLLTLCNAYGGMERT--FMPP VM-RMIDDDLLFVSPSRKR ABAFFMTMTEGVEFENKSNLKKCA  
*Homo sapiens* KSVYVOCGICVPOGCSLSLTLCSGCGDMENK-IFAGI VM-RVDDDLFVTPSRER AKAILKLFLEGFPFONKSTNLMKTCV  
 LMLR-LVDDDLFVTPHLTH AAFMLCKMIKGNSEYFNPSLNADKILV  
 AKFELRTRVVRGVSEYFCVNNLRFKIV

B'

C

D

1 11

*Procerodes plebeja* YSTLSWLGWQI  
*Dendrocoelum lacteum* RTLPWLGYNL  
*Polycelis felina* RTLPWLGYNF  
*Polycelis nigra* RTLPWLGYNF  
*Girardia tigrina* CRTLPWLGWYI  
*Schmidtea lugubris* SFLPWLGYNL  
*Schmidtea mediterranea* SVLPWLGYNL  
*Dugesia benazzi* SVLPWLGYNL  
*Dugesia japonica* SITLPWLGYNL  
*Dugesia ryukyensis* PITLPWLGYNL  
*Dugesia tahitiensis* PITLPWLGYNL  
*Aplysia californica* SEPTLTFCLGAT  
*Biomphalaria glabrata* NGLTFSCGLGF  
*Crassostrea gigas* DWPLWGLLF  
*Homo sapiens* HGLFVWGLLL

E
